# Supplementary material for: Fundamental Understanding of Dye Coverage and Performance in Dye-Sensitized Solar Cells Using Copper Electrolyte
Source: MDPI journal article supplement (doi:10.3390/en16196913), 2023-09-30
Supplement: s1 [file s1]

## Supporting Information

# Fundamental Understanding of Dye Coverage and Performance in Dye-Sensitized Solar Cells using Copper Electrolyte under Outdoor/Indoor Illumination

Sourava Chandra Pradhan <sup>1,2</sup>, Jayadev Velore <sup>1,2</sup>, Sruthi MM <sup>1,2</sup> and Suraj Soman <sup>1,2,\*</sup>

<sup>1</sup> Centre for Sustainable Energy Technologies (C-SET), CSIR-National Institute for Interdisciplinary Science and Technology (CSIR-NIIST), Thiruvananthapuram-695019, India

<sup>2</sup> Academy of Scientific and Innovative Research (AcSIR), Ghaziabad-201002, India

\* Correspondence: suraj@niist.res.in

**Table S1.** Photovoltaic parameters of DSCs with D35 sensitizer and [Cu(tmby)<sub>2</sub>]<sup>2+/1+</sup> electrolyte under various outdoor illuminations.

| Intensity (mWcm <sup>-2</sup> ) | Dye Concentration (mM) | V <sub>oc</sub> (V) | J <sub>sc</sub> (mA cm <sup>-2</sup> ) | FF   | Efficiency (%) |
|---------------------------------|------------------------|---------------------|----------------------------------------|------|----------------|
| 100                             | 0.01                   | 0.6                 | 2.40                                   | 0.49 | 0.7            |
|                                 | 0.05                   | 0.8                 | 4.62                                   | 0.6  | 2.2            |
|                                 | 0.1                    | 1.0                 | 10.22                                  | 0.63 | 6.5            |
|                                 | 0.2                    | 0.9                 | 9.91                                   | 0.64 | 5.7            |
|                                 | 0.3                    | 0.9                 | 9.01                                   | 0.64 | 5.1            |
| 70                              | 0.01                   | 0.6                 | 1.72                                   | 0.48 | 0.7            |
|                                 | 0.05                   | 0.8                 | 3.34                                   | 0.59 | 2.2            |
|                                 | 0.1                    | 1.0                 | 7.58                                   | 0.65 | 7.0            |
|                                 | 0.2                    | 0.9                 | 7.00                                   | 0.66 | 5.7            |
|                                 | 0.3                    | 0.9                 | 6.20                                   | 0.63 | 4.8            |
| 40                              | 0.01                   | 0.5                 | 0.81                                   | 0.45 | 0.4            |
|                                 | 0.05                   | 0.7                 | 1.62                                   | 0.56 | 1.7            |
|                                 | 0.1                    | 1.0                 | 4.14                                   | 0.69 | 6.8            |
|                                 | 0.2                    | 0.8                 | 3.94                                   | 0.64 | 5.3            |
|                                 | 0.3                    | 0.8                 | 3.54                                   | 0.63 | 3.6            |
| 10                              | 0.01                   | 0.3                 | 0.16                                   | 0.36 | 0.2            |
|                                 | 0.05                   | 0.5                 | 0.30                                   | 0.5  | 0.8            |
|                                 | 0.1                    | 0.9                 | 0.95                                   | 0.64 | 5.2            |
|                                 | 0.2                    | 0.7                 | 0.86                                   | 0.55 | 3.4            |
|                                 | 0.3                    | 0.7                 | 0.78                                   | 0.55 | 3.1            |

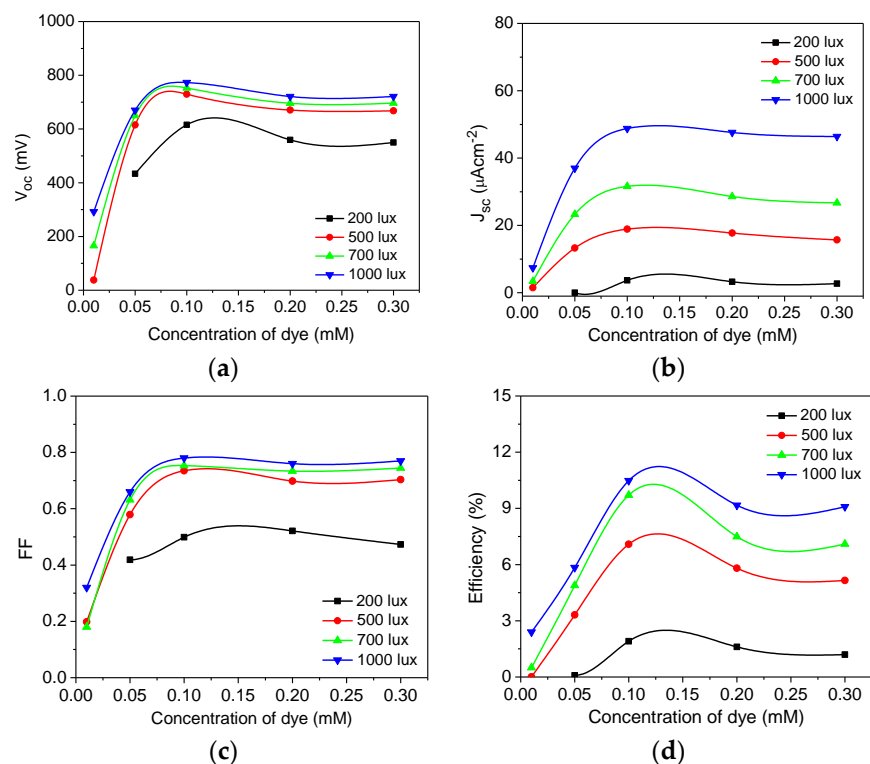

**Figure S1.** Photovoltaic characteristics of DSCs with D35 sensitizer and  $[\text{Cu}(\text{tmby})_2]^{2+/1+}$  electrolyte (a)  $V_{oc}$ , (b)  $J_{sc}$ , (c) FF and (d) efficiency from 0.1 sun to 1 sun as a function of dye concentration (0.01 mM, 0.05 mM, 0.1 mM, 0.2 mM, and 0.3 mM) under indoor illumination.

**Table S2.** Photovoltaic parameters of DSCs with D35 sensitizer and  $[\text{Cu}(\text{tmby})_2]^{2+/1+}$  electrolyte under various indoor illuminations.

| Irradiance (Lux) | Dye Concentration (mM) | $V_{oc}$ (mV) | $J_{sc}$ ( $\mu\text{Acm}^{-2}$ ) | FF   | Efficiency (%) |
|------------------|------------------------|---------------|-----------------------------------|------|----------------|
| 1000             | 0.01                   | 292           | 7.4                               | 0.32 | 2.4            |
|                  | 0.05                   | 670           | 37                                | 0.66 | 5.8            |
|                  | 0.1                    | 773           | 48.8                              | 0.78 | 10.5           |
|                  | 0.2                    | 721           | 47.6                              | 0.76 | 9.2            |
|                  | 0.3                    | 721           | 46.4                              | 0.77 | 9.1            |
| 700              | 0.01                   | 165           | 3.4                               | 0.18 | 0.5            |
|                  | 0.05                   | 649           | 23.3                              | 0.63 | 4.9            |
|                  | 0.1                    | 753           | 31.6                              | 0.75 | 9.7            |
|                  | 0.2                    | 696           | 28.6                              | 0.73 | 7.5            |
|                  | 0.3                    | 697           | 26.7                              | 0.74 | 7.1            |
| 500              | 0.01                   | 38            | 1.5                               | 0.20 | 0.0            |
|                  | 0.05                   | 615           | 13.3                              | 0.58 | 3.3            |
|                  | 0.1                    | 730           | 18.9                              | 0.73 | 7.1            |
|                  | 0.2                    | 670           | 17.7                              | 0.70 | 5.8            |
|                  | 0.3                    | 668           | 15.7                              | 0.70 | 5.2            |
| 200              | 0.01                   | 0             | 0.0                               | 0.00 | 0.0            |
|                  | 0.05                   | 433           | 0.0                               | 0.42 | 0.1            |
|                  | 0.1                    | 616           | 3.7                               | 0.50 | 1.9            |
|                  | 0.2                    | 559           | 3.3                               | 0.52 | 1.6            |
|                  | 0.3                    | 550           | 2.7                               | 0.47 | 1.2            |
